# Supplementary material
Source: MDPI journal article supplement (https://www.mdpi.com/2504-3900/69/1/12)
Supplement: s1 [file s1]

**CGPM  
2020**

# The First International Conference on “Green” Polymer Materials

05–25 NOVEMBER 2020 | ONLINE

Chaired by PROF. DR. ANTONIO PIZZI and PROF. DR. FRANK WIESBROCK

 *polymers*

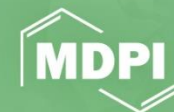

## Fabrication and Characterization of Air-jet-Spun Nanofibers and Thin Films from Corn Zein Protein for the Delivery of Therapeutic Molecules

Christopher R. Gough<sup>1</sup> and Xiao Hu<sup>2,\*</sup>

<sup>1</sup> Department of Chemistry and Biochemistry, Rowan University, Glassboro, NJ, USA;

<sup>2</sup> Department of Physics, Rowan University, Glassboro, NJ, USA.

\* Corresponding author: hu@rowan.edu

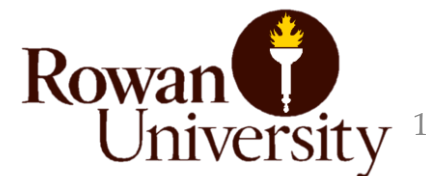

## **Abstract:**

Corn zein protein is a cheap, widely available biopolymer that is easily extracted from corn and processed into useful forms. In this study, zein was dissolved along with several model drugs or sodium citrate, which was then cast into thin films or air-spun into nanofibers. The molecular weight, solubility and charge of the selected model drugs are different, and the weight percentage of citrate also varies (1-30%). The integrity of the loaded biomaterials were characterized through FTIR, SEM, DSC, and TGA analysis. FTIR analysis showed that the therapeutics interacted strongly with the protein structure of zein nanofibers, transforming their structure from a random coil network to an alpha helical structure. Zein films did not show this shift. This structural change reflects the results of the drug release study, where nanofibers showed a slower, sustained release of therapeutics compared to their film counterparts. Statistical analysis by T-Test proved a significant difference in release between fibers and films ( $P < 0.01$ ). The structural integration also improved the thermal properties of the biomaterial, where fibers did not degrade until temperatures reached 160°C, but films degrade earlier at 130°C. Finally, the biocompatibility of zein was confirmed by culturing HEK293 cells on zein films and fibers for 72 hours. An MTT assay confirmed good biocompatibility and an improved density of fibers and films compared to a blank control.

**Keywords:** biomaterial; corn zein protein; drug release; nanofiber; film

# Graphical Abstract

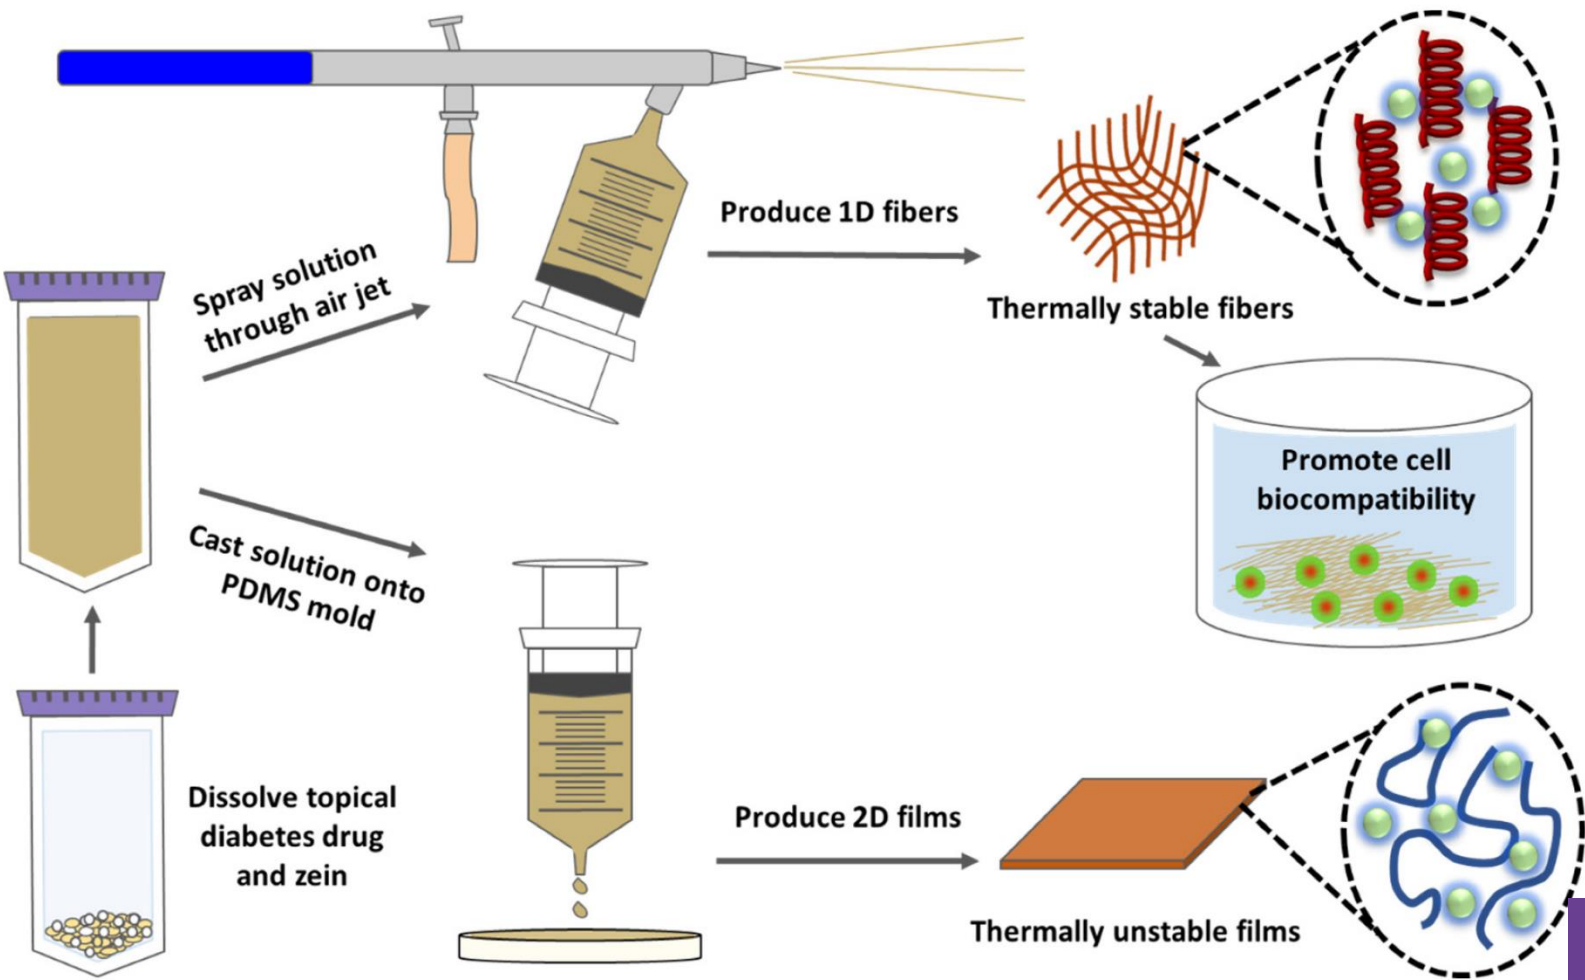

# Morphology Analysis – FTIR on Nanofibers

## Model Drugs

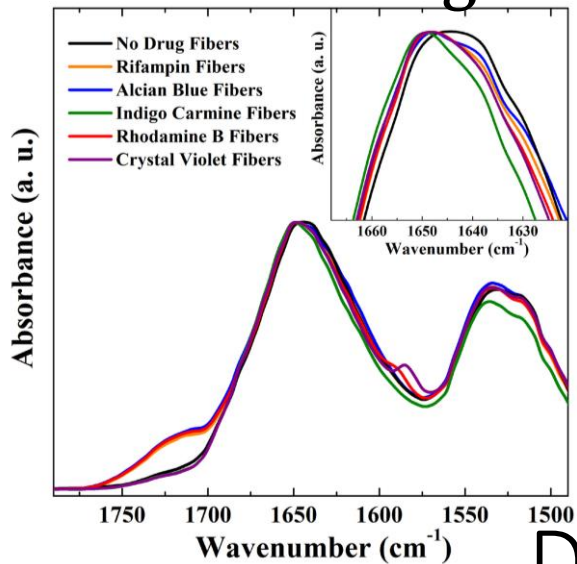

## Sodium Citrate

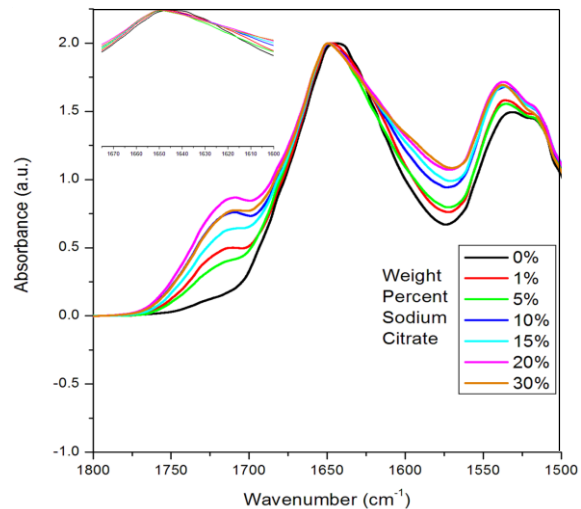

Drug Release

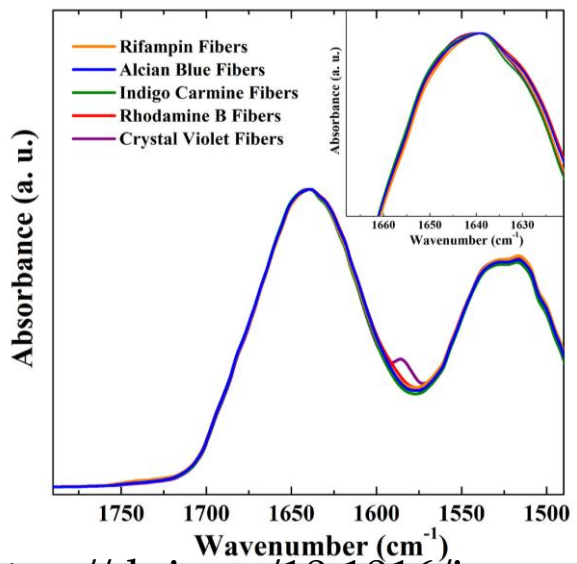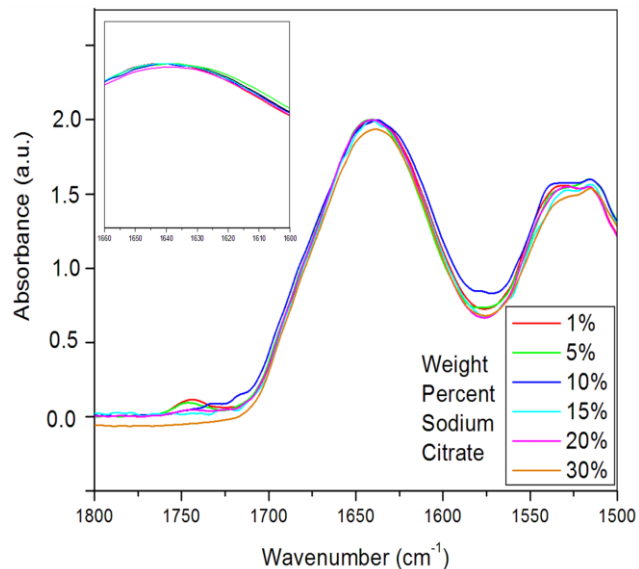

# Morphology Analysis – FTIR on Films

## Model Drugs

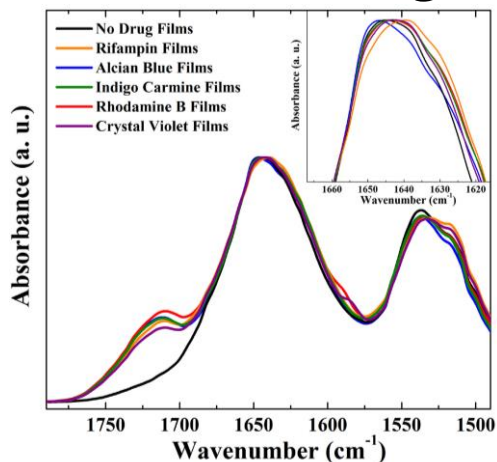

## Drug Release

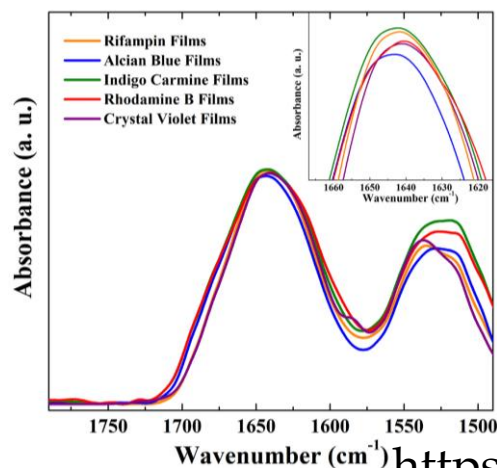

## Sodium Citrate

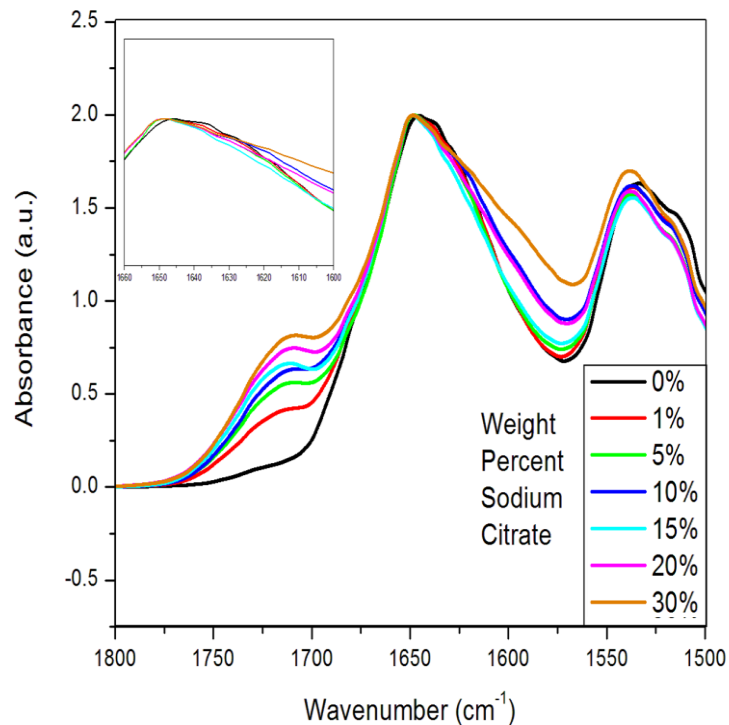

# Morphology Analysis- SEM of Nanofibers

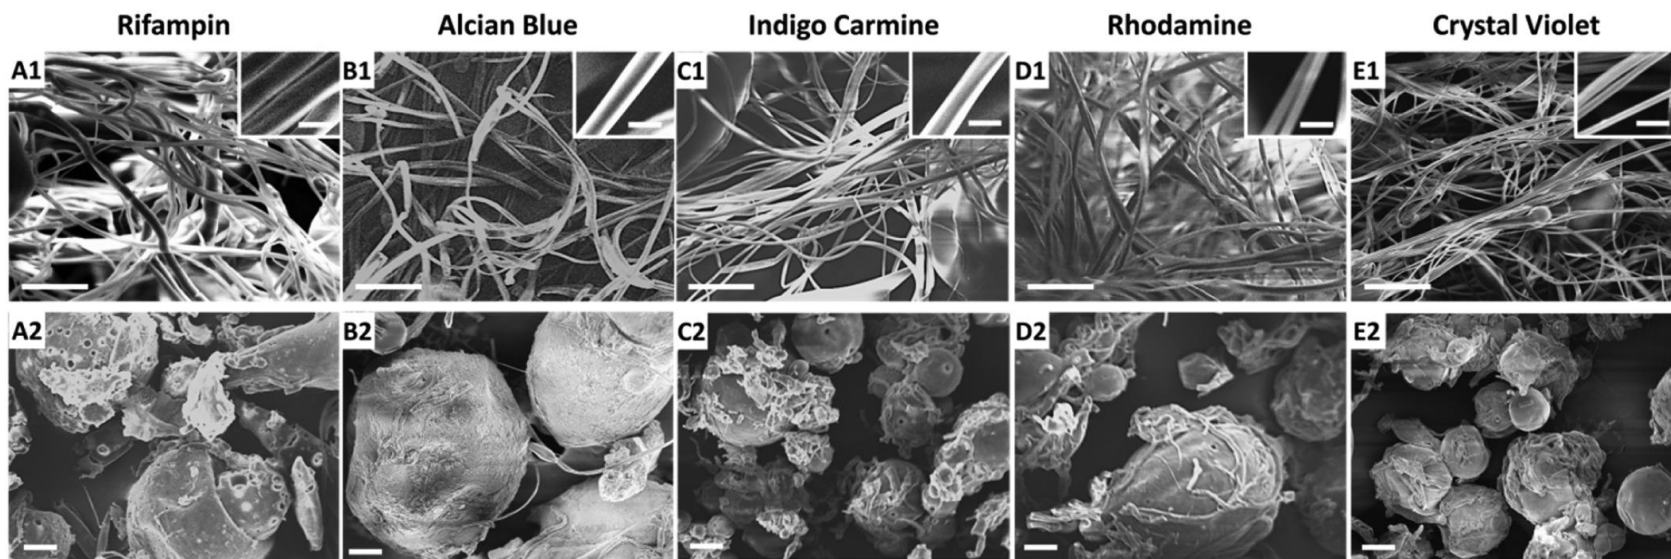

**No drugs**

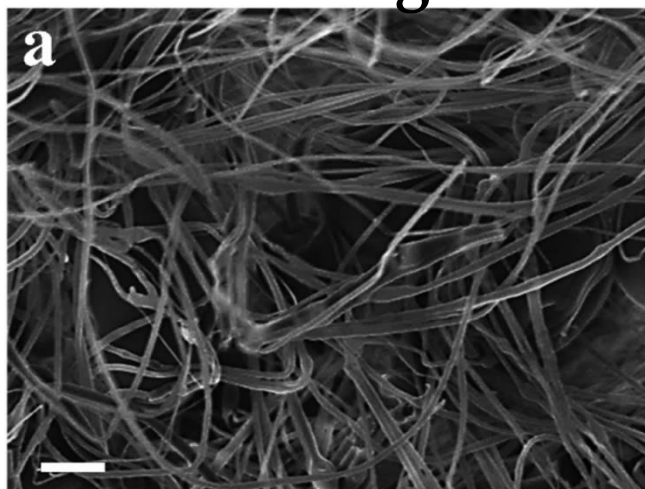

**Sodium citrate**

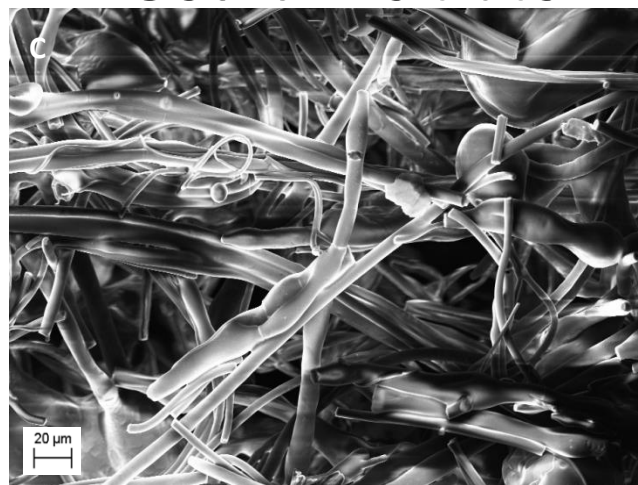

<https://doi.org/10.1016/j.msec.2020.111419>

**CGPM**  
**2020**

# Morphology Analysis- SEM of Films

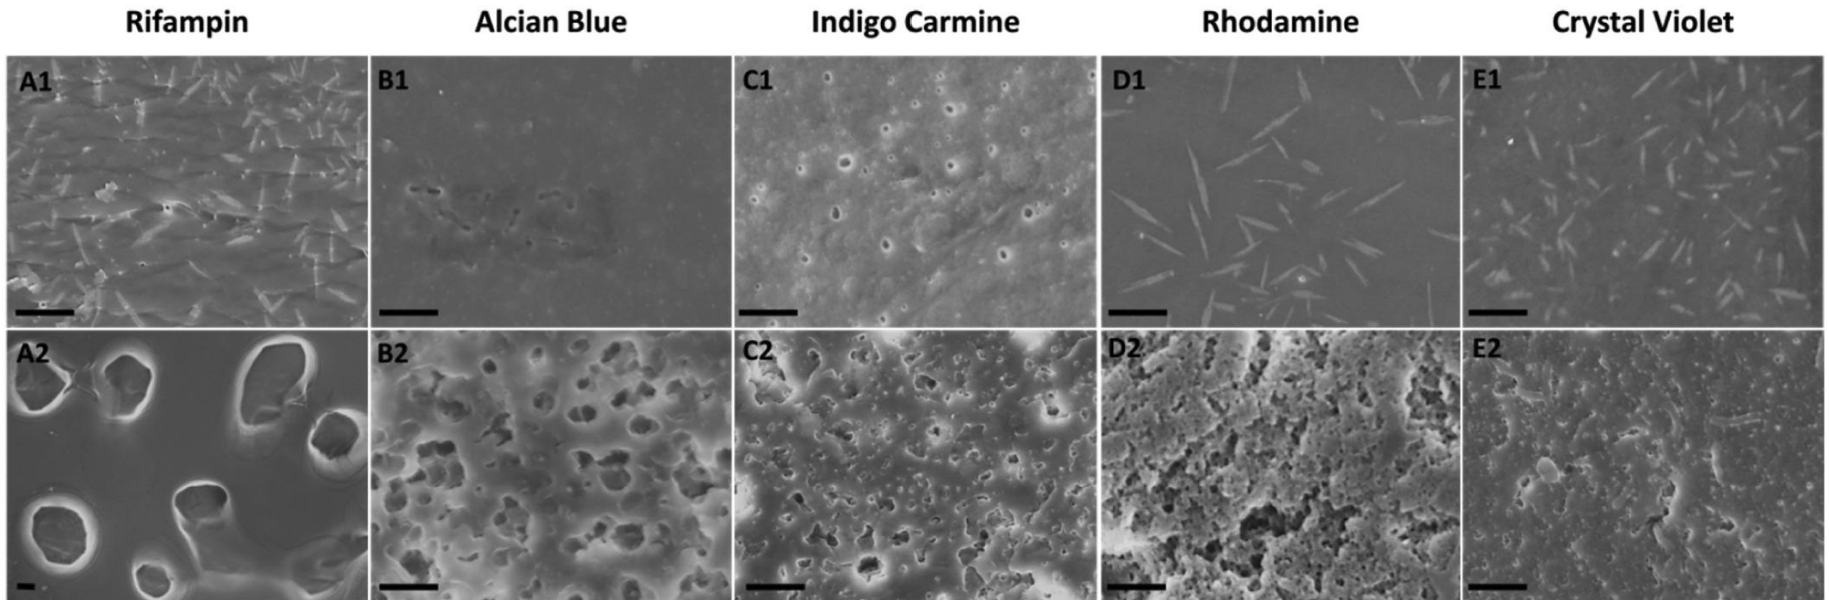

**No drugs**

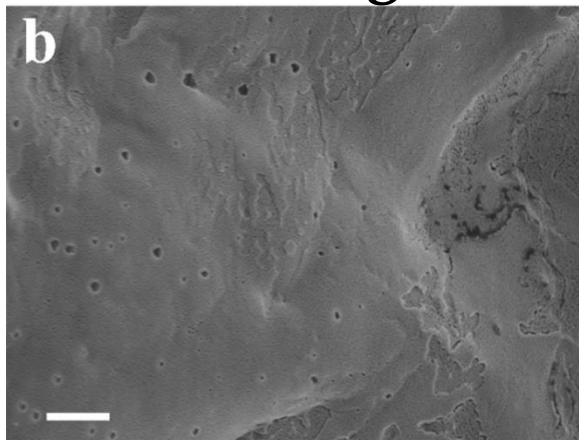

# Biocompatibility- Microscopy

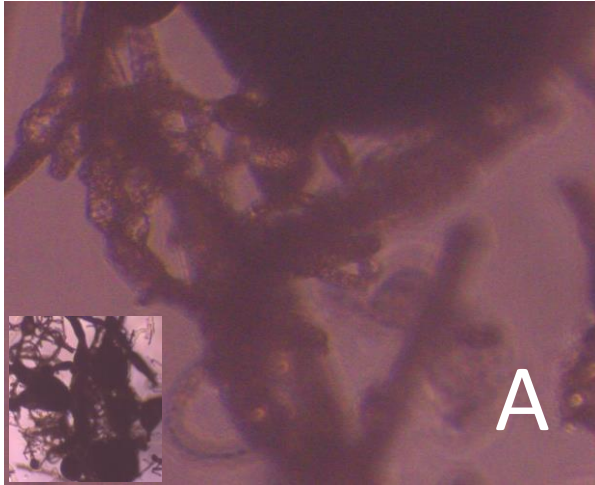

**With  
Citrate**

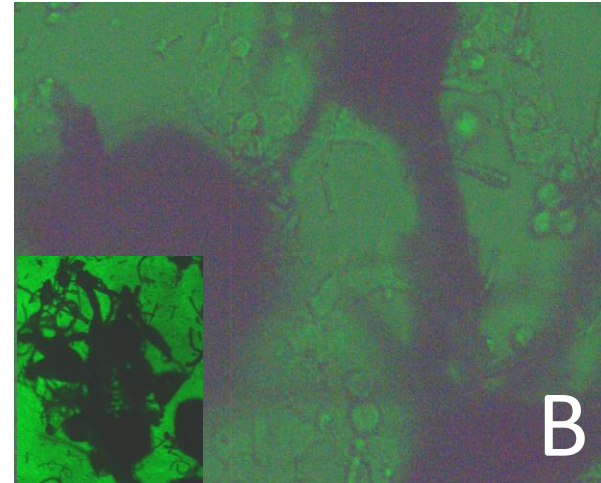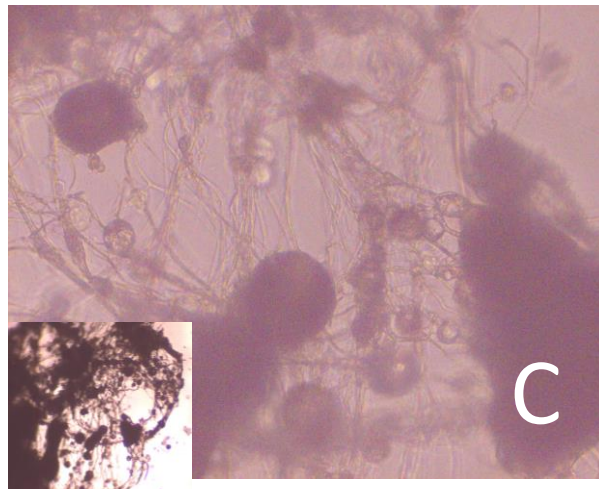

**Without**

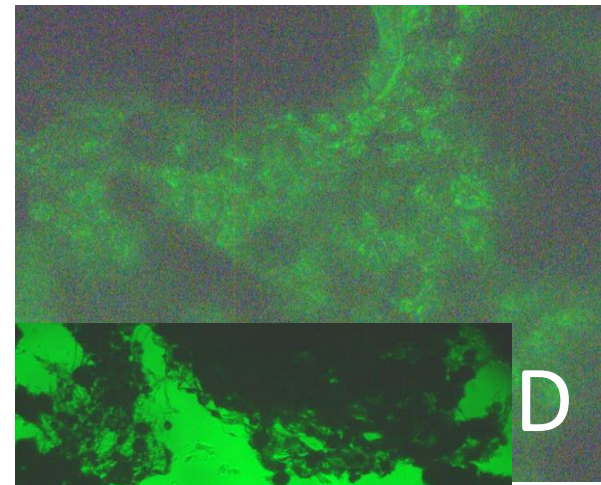



# Biocompatibility – MTT Assay

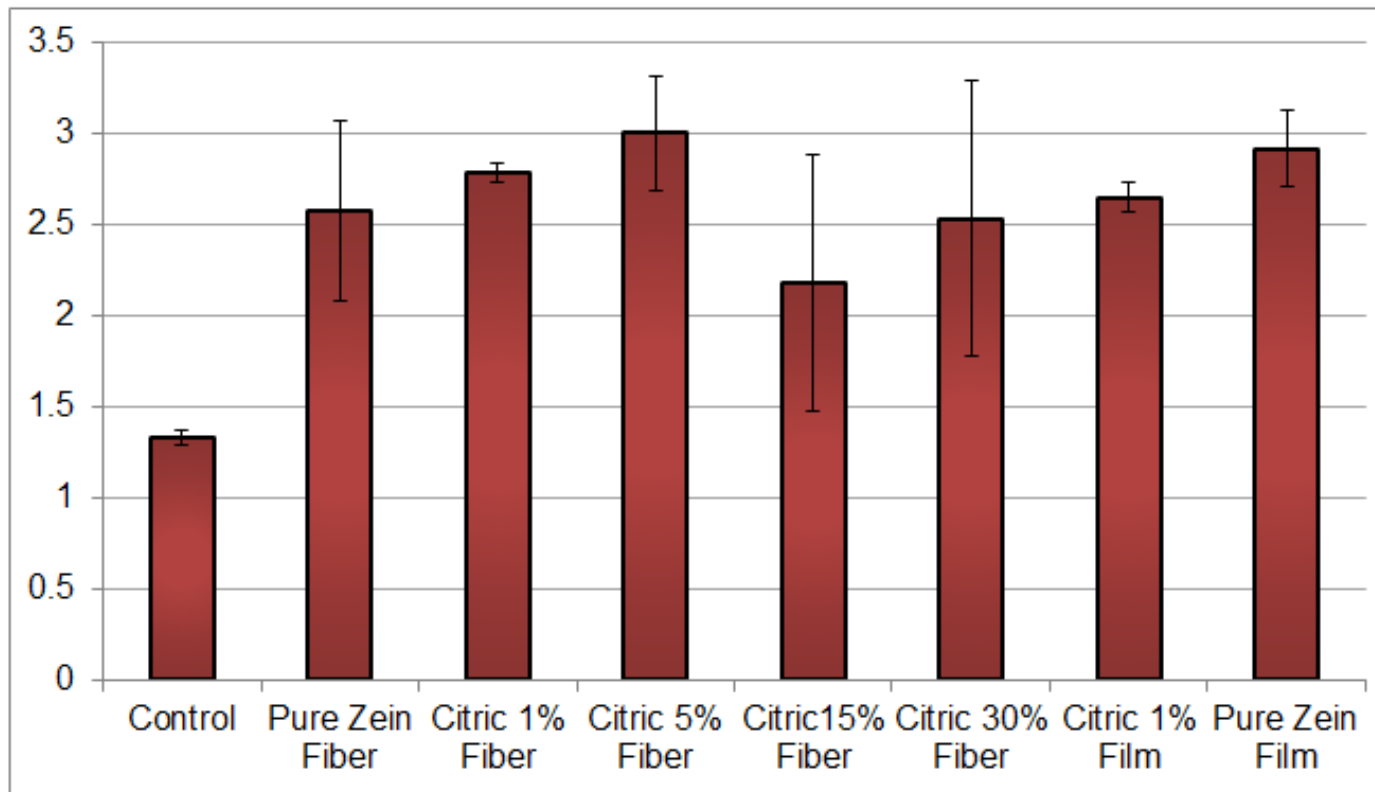

# Thermal Analysis – DSC on Nanofibers

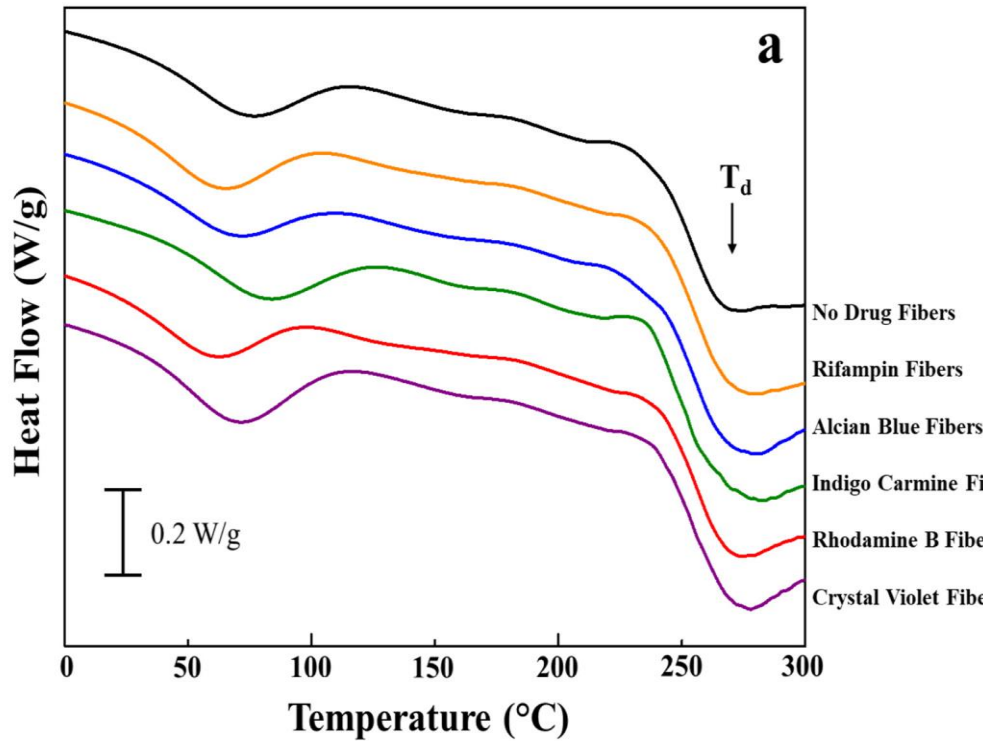

**Model  
Drugs**

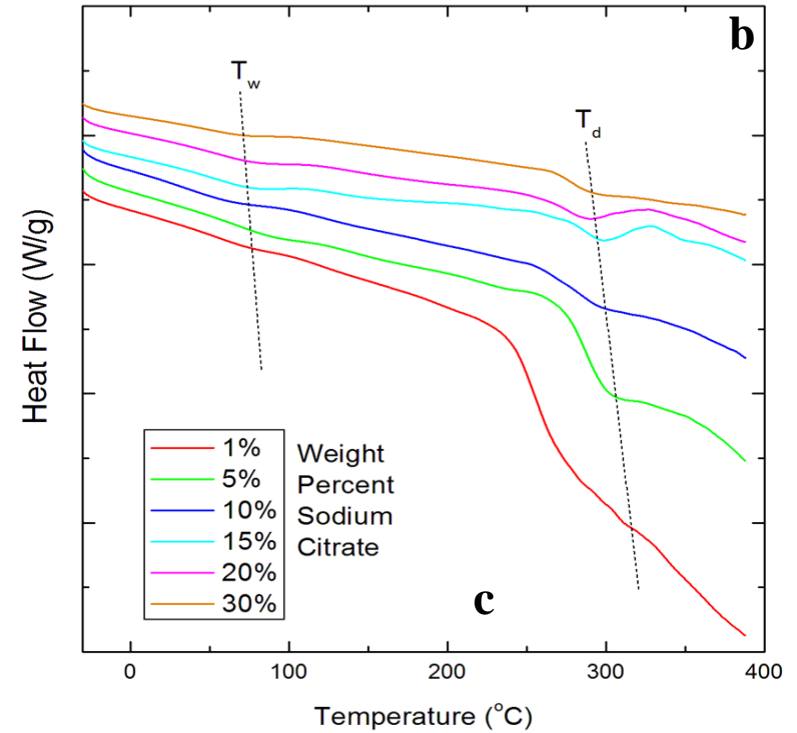

**Sodium  
Citrate**

**CGPM  
2020**

# Thermal Analysis – DSC on Films

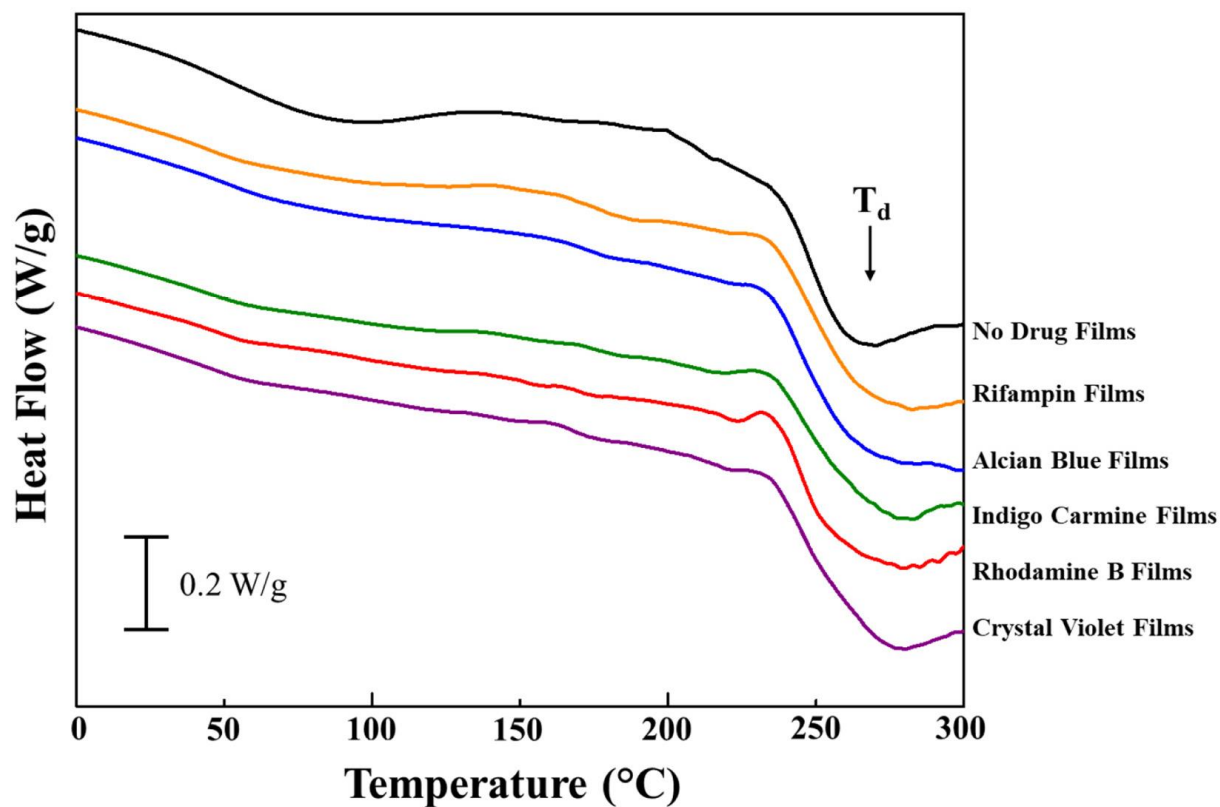

# Thermal Analysis – DSC on Nanofibers

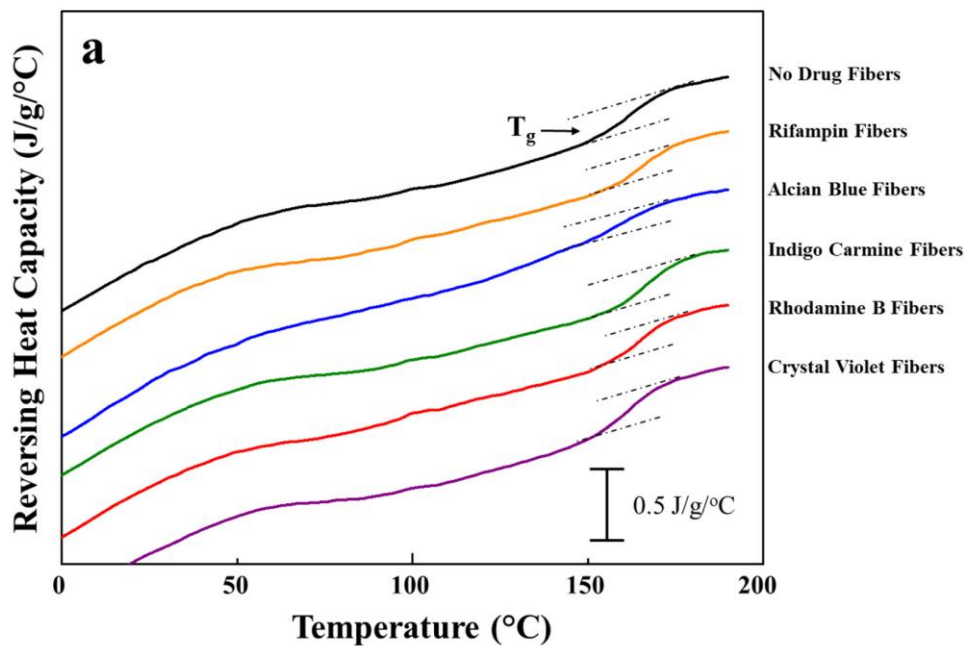

**Model  
Drugs**

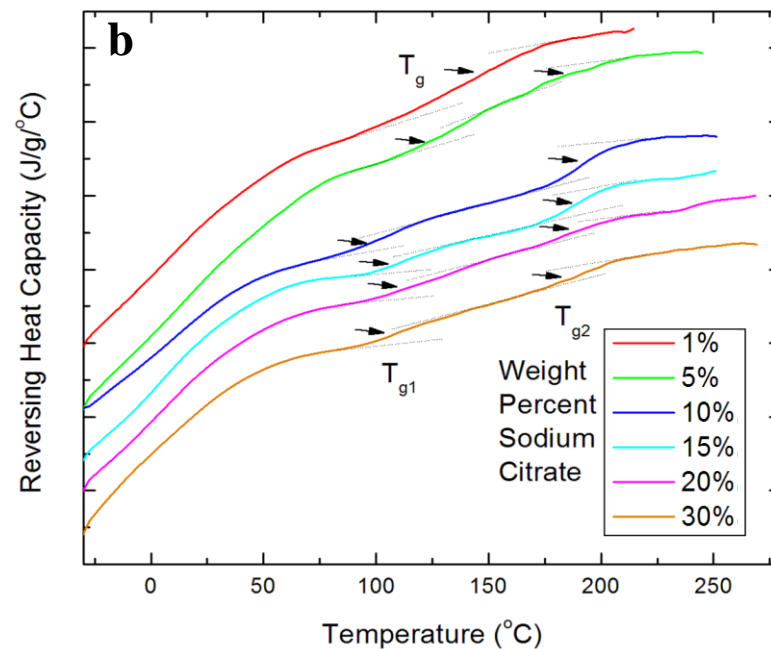

**Sodium  
Citrate**

**CGPM  
2020**

# Thermal Analysis – DSC on Films

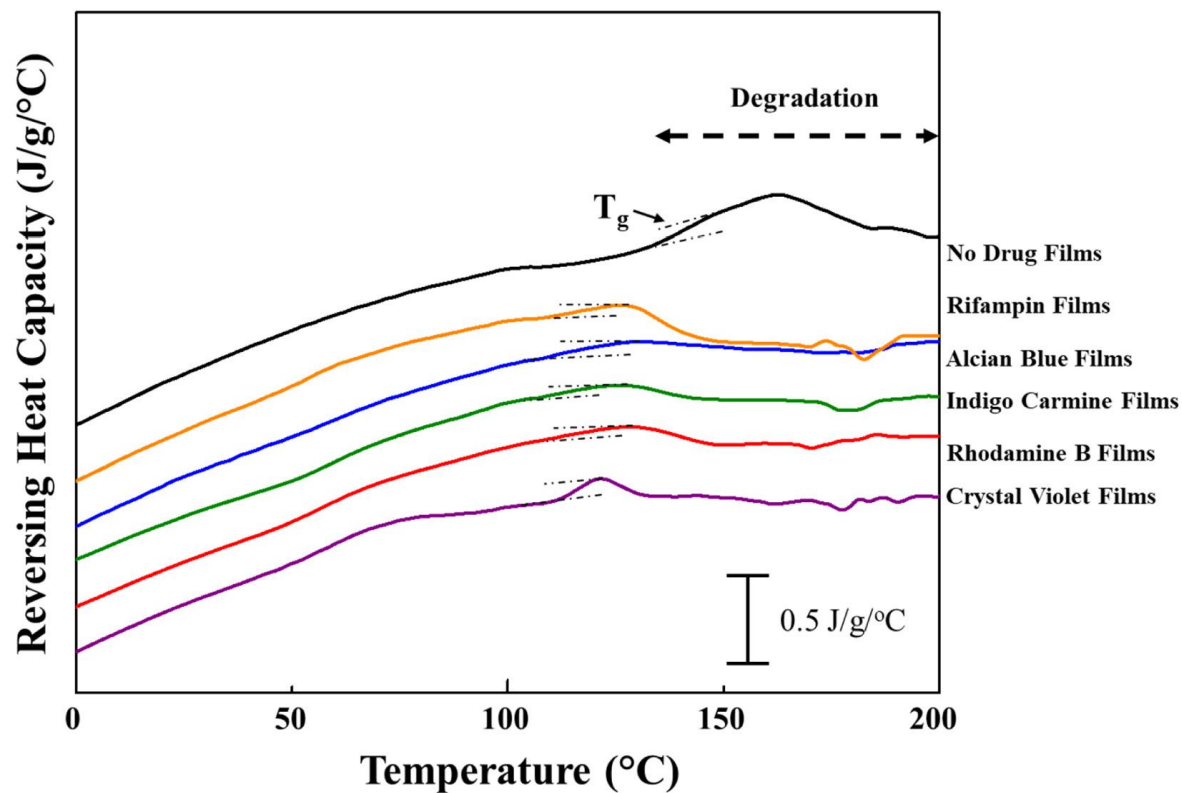

# Thermal Analysis – Model Drugs

| Model Drug        | Fiber                                    |                                     | Film                                     |                                     |
|-------------------|------------------------------------------|-------------------------------------|------------------------------------------|-------------------------------------|
|                   | Glass Transition<br>$T_g/^\circ\text{C}$ | Degradation<br>$T_d/^\circ\text{C}$ | Glass Transition<br>$T_g/^\circ\text{C}$ | Degradation<br>$T_d/^\circ\text{C}$ |
| No drug           | 162.3                                    | 267.1                               | 146.2                                    | 268.5                               |
| Rifampin          | 166.8                                    | 272.0                               | 121.6                                    | 282.1                               |
| Alcian Blue       | 158.2                                    | 276.9                               | 120.1                                    | 282.9                               |
| Indigo<br>Carmine | 166.2                                    | 275.6                               | 120.4                                    | 280.9                               |
| Crystal Violet    | 162.4                                    | 273.8                               | 115.3                                    | 278.5                               |
| Rhodamine B       | 164.1                                    | 272.6                               | 122.3                                    | 279.2                               |

# Thermal Analysis – Sodium Citrate

| Sodium Citrate wt% | Fiber                        |                        | Film                             |                                  |
|--------------------|------------------------------|------------------------|----------------------------------|----------------------------------|
|                    | Water evaporation $T_w$ (°C) | Degradation $T_d$ (°C) | Glass Transition 1 $T_{g1}$ (°C) | Glass Transition 2 $T_{g2}$ (°C) |
| 1                  | 81                           | 311                    | 139                              | N/A                              |
| 5                  | 83                           | 305                    | 128                              | 189                              |
| 10                 | 73                           | 297                    | 104                              | 190                              |
| 15                 | 78                           | 297                    | 109                              | 188                              |
| 20                 | 75                           | 290                    | 116                              | 187                              |
| 30                 | 69                           | 289                    | 105                              | 186                              |

# Drug Release – Model Drugs

| Model Drug     | Fiber |                | Film  |                |
|----------------|-------|----------------|-------|----------------|
|                | n     | R <sup>2</sup> | n     | R <sup>2</sup> |
| Rifampin       | 0.392 | 0.99           | 0.284 | 0.87           |
| Alcian Blue    | 0.111 | 0.97           | 0.151 | 0.96           |
| Indigo Carmine | 0.132 | 0.88           | 0.430 | 0.98           |
| Crystal Violet | 0.353 | 0.93           | 0.118 | 0.93           |
| Rhodamine B    | 0.337 | 0.95           | 0.203 | 0.91           |

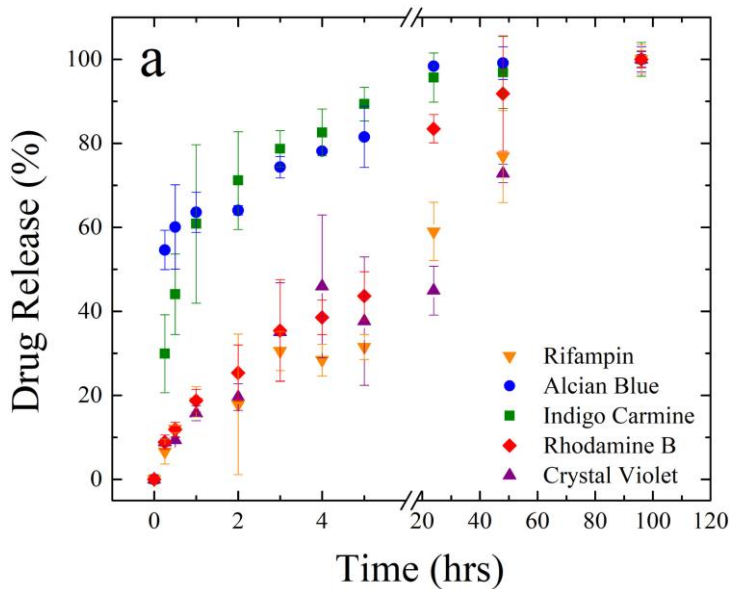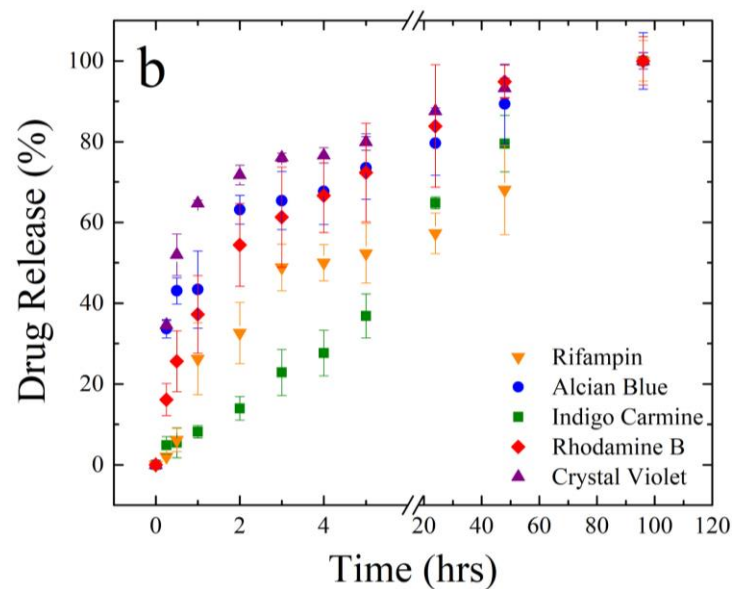

<https://doi.org/10.1016/j.msec.2020.111419>

CGPM  
2020



# Drug Release - Citrate

| Citrate wt% | Pearson Correlation | T-Stat | p(T≤t) |
|-------------|---------------------|--------|--------|
| 5           | 0.983               | 3.948  | 0.003  |
| 10          | 0.977               | 3.363  | 0.007  |
| 20          | 0.984               | 4.128  | 0.002  |
| 30          | 0.993               | 1.464  | 0.174  |

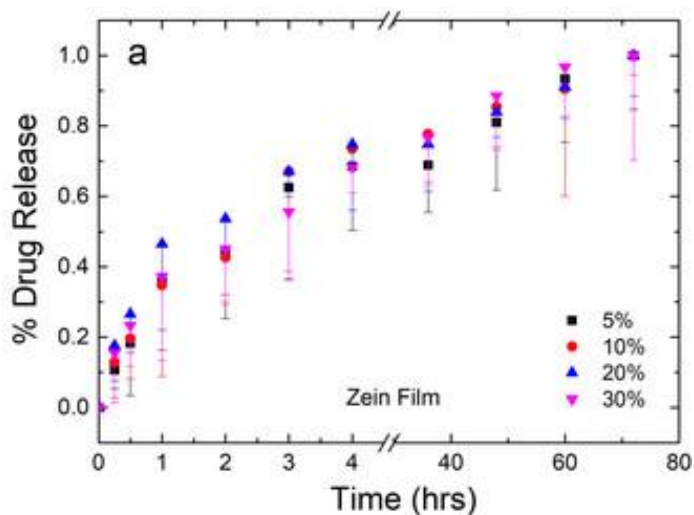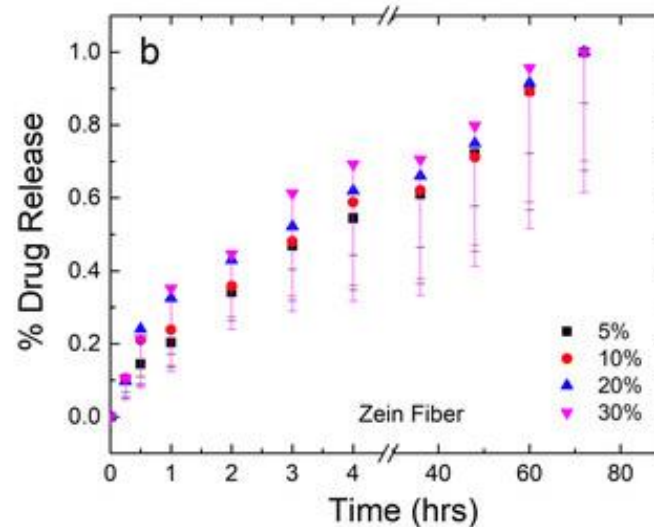

# Mechanism

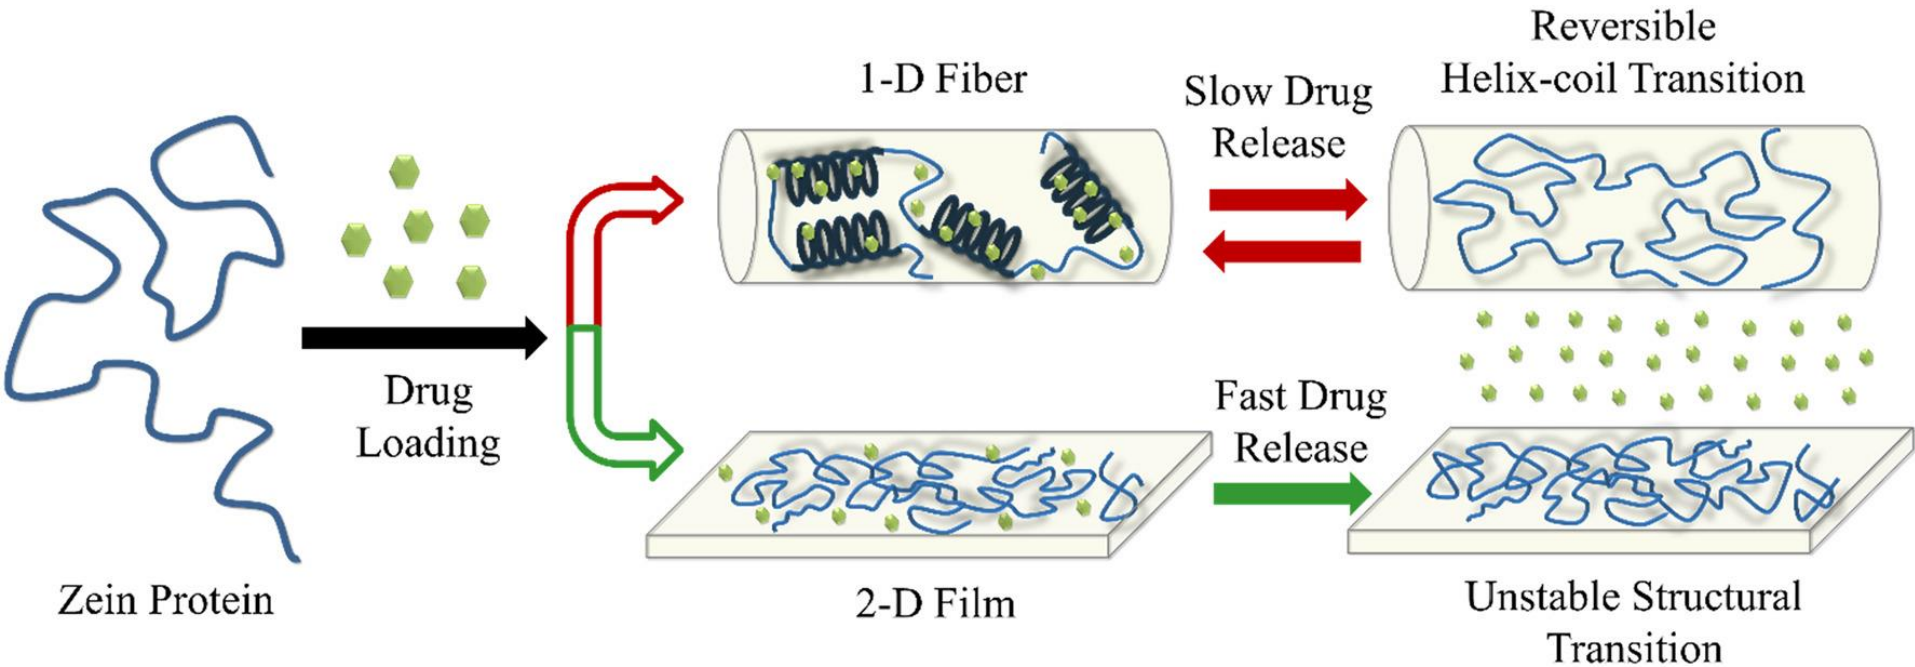

## Conclusions

- Corn zein is a biocompatible, easy to work with biopolymer for fabricating effective drug delivery vehicles
- Nanofibers provide a more thermally stable biopolymer
- Nanofibers interact with therapeutic molecules to better control the release of therapeutics

# Acknowledgments

We would like to thank all the members of the Hu lab for their support

We also extend our thanks to Dr. Xiaoyang Mou of the Department of Chemistry and Biochemistry at Rowan University for his assistance with cell biocompatibility testing.

This study was supported by the Rowan University Start-up Grants, NSF-MRI Program (DMR-1338014 and (DMR-1809541), NSF Materials Eng. & Processing program (CMMI-1561966), and New Jersey Health Foundation research program (PC111-17).
